# Supplementary material for: Experiences and impact of international medical volunteering: a multi-country mixed methods study
Source: HighWire-hosted journal article supplement (doi:10.1136/bmjopen-2020-041599), 2021-03-01
Supplement: bmjopen-2020-041599supp001_data_supplement.pdf [file bmjopen-2020-041599supp001_data_supplement.pdf]

Centre for Maternal and Newborn Health  
 Liverpool School of Tropical Medicine  
 email: cmnh@lstm.ac.uk  
 WHO Collaborating Centre and winner of the BMJ Women's Health Award 2015  
 Striving for global equality in maternal and newborn health

# \* Required Information

page 1

\* 1.

## WELCOME TO THE CMNH VOLUNTEER SURVEY.

As a valued member of the larger community of the Centre of Maternal and Newborn Health (CMNH) at the Liverpool School of Tropical Medicine (LSTM), you are invited to kindly participate in the following survey entitled:

**HEALTHCARE VOLUNTEERS WHO FACILITATE TRAINING IN MATERNAL AND NEWBORN HEALTH PROGRAMMES IN LOW AND MIDDLE INCOME COUNTRIES: AN ONLINE SURVEY REGARDING BENEFITS FOR THE VOLUNTEER, THE HOST COUNTRY AND THE HOME COUNTRY.**

## BACKGROUND

Since 2006, UK volunteers have delivered training in 8 African and 3 Asian countries with over 1681 national facilitators trained who have then helped to train over 16,324 participants. We are keen to explore the impact of this programme to the individual volunteer, the sending country (UK) and the host country.

## PURPOSE OF THE STUDY

To understand further the contribution that international healthcare volunteers provide to knowledge and skills facilitation and provision in low and middle income countries. At present, how this sharing of expertise works, the effects on the host countries, home countries and the individuals themselves is not well understood or documented. While it is commonly believed that international healthcare volunteers can play an important role in developing the capacity of healthcare providers in low and middle income countries, there is a lack of robust literature documenting if and how this can be successful. In particular, how volunteering experiences affect the way returned volunteers work in their home countries health systems and how healthcare volunteers can be better prepared to meet the needs of the host country need be to explored.

## PROCEDURE

During the study, you will be asked questions regarding your views and perceptions of medical volunteering in the capacity of facilitation of skills and drills 'Making it Happen' courses. This should not take more than 20 minutes of your time to complete.

## RISKS

Potential risk of highlighting negative experiences, if this occurs please use this opportunity to contact the team for support if required.

None identified

## BENEFITS

There are no direct benefits to the participant.

## PRIVACY

We will keep all of your data private. No one will have access to the data other than the study staff. Data obtained from you will be used only for the purpose of the study.

## VOLUNTARY PARTICIPATION

Your participation in this survey is completely voluntary. You have the right to refuse to participate in any questions at any time during the survey. You can also refuse to respond to specific questions or answer questions if you choose.

## RIGHTS OF THE PARTICIPANTS

Please feel free to email the research team to ask any questions you have about the survey. Email address: cmnh@lstm.ac.uk

## COMPLAINTS

If you have a concern about any aspect of this study, you should email the research team. If you remain unhappy and wish to complain formally, you can do this through contacting one of the administrative team of the CMNH-LSTM.

**Do you agree to give your consent to participate in this survey?** (Select one option)

☐ Yes

☐ No

**2. Age (in years)** (Select one option)

☐ < 25

☐ 25 - 55

☐ 55 - 65

☐ >65

☐ Other (Please specify) \_\_\_\_\_

**3. Gender** (Select one option)

☐ Male

- ~
- ☐ Female
- ☐ Other (Please specify) \_\_\_\_\_

**4. In which country are you resident/working currently?** (Select one option)

- ☐ Bangladesh
- ☐ Ghana
- ☐ Kenya
- ☐ India
- ☐ Malawi
- ☐ Nigeria
- ☐ Pakistan
- ☐ Sierra Leone
- ☐ South Africa
- ☐ Tanzania
- ☐ United Kingdom
- ☐ Zimbabwe
- ☐ Other (Please specify) \_\_\_\_\_

**5. What is your primary professional role?** (Select one option)

- ☐ Midwife
- ☐ Obstetrician
- ☐ Anaesthetist
- ☐ Paediatrician
- ☐ Nurse
- ☐ Nurse / Midwife
- ☐ Clinical officer
- ☐ Health officer
- ☐ Other (Please specify) \_\_\_\_\_

**6. Current employment status** (Select one option)

- ☐ Clinically active - Full time
- ☐ Clinically active - Part time
- ☐ Retired
- ☐ Other
- ☐ Other (Please specify) \_\_\_\_\_

**7. How many times have you volunteered as a facilitator on a 'Making it Happen' course?** (Select one option)

- ☐ 0
- ☐ <5
- ☐ 5-10
- ☐ >10
- ☐ Other (Please specify) \_\_\_\_\_

**8. Please specify what country or countries you have volunteered as a facilitator?**  
Please select all that apply.

- ☐ United Kingdom
- ☐ Kenya
- ☐ Zimbabwe
- ☐ Sierra Leone
- ☐ India
- ☐ Bangladesh
- ☐ South Africa
- ~

- ☐ Malawi
- ☐ Pakistan
- ☐ Ghana
- ☐ Nigeria
- ☐ Tanzania
- ☐ Other (Please specify) \_\_\_\_\_

**9. What were your motivations to volunteer as a facilitator on a 'Making it Happen' training course?**

\_\_\_\_\_

**10. Before facilitating on a 'Making it Happen' training course, I had no preconceived ideas or expectations.**

(Select one option)

|                       |                       |                       |                        |
|-----------------------|-----------------------|-----------------------|------------------------|
| strongly agree<br>0   | agree<br>1            | disagree<br>2         | strongly disagree<br>3 |
| <input type="radio"/> | <input type="radio"/> | <input type="radio"/> | <input type="radio"/>  |

**11. Before facilitating on the course I thought the course would be well organised and be straightforward**

(Select one option)

|                       |                       |                       |                        |
|-----------------------|-----------------------|-----------------------|------------------------|
| strongly agree<br>0   | agree<br>1            | disagree<br>2         | strongly disagree<br>3 |
| <input type="radio"/> | <input type="radio"/> | <input type="radio"/> | <input type="radio"/>  |

**12. I expected to improve participants knowledge and skills**

(Select one option)

|                       |                       |                       |                        |
|-----------------------|-----------------------|-----------------------|------------------------|
| strongly agree<br>0   | agree<br>1            | disagree<br>2         | strongly disagree<br>3 |
| <input type="radio"/> | <input type="radio"/> | <input type="radio"/> | <input type="radio"/>  |

**13. I expected to have a personally rewarding experience**

(Select one option)

|                       |                       |                       |                        |
|-----------------------|-----------------------|-----------------------|------------------------|
| strongly agree<br>0   | agree<br>1            | disagree<br>2         | strongly disagree<br>3 |
| <input type="radio"/> | <input type="radio"/> | <input type="radio"/> | <input type="radio"/>  |

**14. I expected to learn about other health systems and cultures**

(Select one option)

|                       |                       |                       |                        |
|-----------------------|-----------------------|-----------------------|------------------------|
| strongly agree<br>0   | agree<br>1            | disagree<br>2         | strongly disagree<br>3 |
| <input type="radio"/> | <input type="radio"/> | <input type="radio"/> | <input type="radio"/>  |

**15. I expected to impact on maternal and newborn health outcomes through my teaching**

(Select one option)

|                       |                       |                       |                        |
|-----------------------|-----------------------|-----------------------|------------------------|
| strongly agree<br>0   | agree<br>1            | disagree<br>2         | strongly disagree<br>3 |
| <input type="radio"/> | <input type="radio"/> | <input type="radio"/> | <input type="radio"/>  |

**16. I expected to be well received by the other facilitators**

(Select one option)

|                       |                       |                       |                        |
|-----------------------|-----------------------|-----------------------|------------------------|
| strongly agree<br>0   | agree<br>1            | disagree<br>2         | strongly disagree<br>3 |
| <input type="radio"/> | <input type="radio"/> | <input type="radio"/> | <input type="radio"/>  |

**17. I expected to be safe and hosted in appropriate accommodation**

(Select one option)

|                       |                       |                       |                        |
|-----------------------|-----------------------|-----------------------|------------------------|
| strongly agree<br>0   | agree<br>1            | disagree<br>2         | strongly disagree<br>3 |
| <input type="radio"/> | <input type="radio"/> | <input type="radio"/> | <input type="radio"/>  |

|   |   |   |   |
|---|---|---|---|
| ○ | ○ | ○ | ○ |
|---|---|---|---|

**18. Other preconceptions not mentioned above?**  


---



---



---

**19. The experience lived up to my expectations** (Select one option)
 

|                     |            |               |                        |
|---------------------|------------|---------------|------------------------|
| strongly agree<br>0 | agree<br>1 | disagree<br>2 | strongly disagree<br>3 |
| ○                   | ○          | ○             | ○                      |

**20. The challenges in conducting training were greater than I had expected.**  
 (Select one option)
 

|                     |            |               |                        |
|---------------------|------------|---------------|------------------------|
| strongly agree<br>0 | agree<br>1 | disagree<br>2 | strongly disagree<br>3 |
| ○                   | ○          | ○             | ○                      |

**21. What did you find were the main challenges during the 'Making it Happen' course?**  
**Please select all that apply.**

- ☐ Not having enough time to undertake training activities
- ☐ Not understanding the local health systems
- ☐ Language barriers
- ☐ The wide range of knowledge and skills between cadres all trained together
- ☐ Participants not interested in training
- ☐ Attitude of participants regarding lack of urgency in responding to emergency
- ☐ Not agreeing with approach to managing emergency from local faculty
- ☐ Shocked by facilities available in the local setting
- ☐ Power cuts
- ☐ Lack of water and sanitation
- ☐ Difficulty with transport and traffic
- ☐ Local poverty
- ☐ None of the above
- ☐ Other (Please specify) \_\_\_\_\_

**22. Has the experience of volunteering impacted on your current personal life?**  
 (Select one option)
 

- ☐ yes
- ☐ no
- ☐ Other (Please specify) \_\_\_\_\_

**23. Has the experience of volunteering impacted on your current work life?**  
 (Select one option)
 

- ☐ Yes
- ☐ No
- ☐ Other (Please specify) \_\_\_\_\_

**24. Volunteering has increased my appreciation of the standard of health care in my current country of residence** (Select one option)
 

|                     |            |               |                        |
|---------------------|------------|---------------|------------------------|
| strongly agree<br>0 | agree<br>1 | disagree<br>2 | strongly disagree<br>3 |
| ○                   | ○          | ○             | ○                      |

**25. Volunteering has increased my appreciation of teamwork and communication** (Select one option)
 

|          |  |  |          |
|----------|--|--|----------|
| strongly |  |  | strongly |
|----------|--|--|----------|

|                       |                       |                       |                       |
|-----------------------|-----------------------|-----------------------|-----------------------|
| agree<br>0            | agree<br>1            | disagree<br>2         | disagree<br>3         |
| <input type="radio"/> | <input type="radio"/> | <input type="radio"/> | <input type="radio"/> |

  

|                                                                                                        |                       |                       |                        |
|--------------------------------------------------------------------------------------------------------|-----------------------|-----------------------|------------------------|
| <b>26. Volunteering has made me less frustrated with my local health system</b><br>(Select one option) |                       |                       |                        |
| strongly agree<br>0                                                                                    | agree<br>1            | disagree<br>2         | strongly disagree<br>3 |
| <input type="radio"/>                                                                                  | <input type="radio"/> | <input type="radio"/> | <input type="radio"/>  |

  

|                                                                                                             |                       |                       |                        |
|-------------------------------------------------------------------------------------------------------------|-----------------------|-----------------------|------------------------|
| <b>27. Volunteering has made me more confident to manage difficult cases at home</b><br>(Select one option) |                       |                       |                        |
| strongly agree<br>0                                                                                         | agree<br>1            | disagree<br>2         | strongly disagree<br>3 |
| <input type="radio"/>                                                                                       | <input type="radio"/> | <input type="radio"/> | <input type="radio"/>  |

  

|                                                                                   |                       |                       |                        |
|-----------------------------------------------------------------------------------|-----------------------|-----------------------|------------------------|
| <b>28. Volunteering has strengthened my leadership skills</b> (Select one option) |                       |                       |                        |
| strongly agree<br>0                                                               | agree<br>1            | disagree<br>2         | strongly disagree<br>3 |
| <input type="radio"/>                                                             | <input type="radio"/> | <input type="radio"/> | <input type="radio"/>  |

  

|                                                                       |                       |                       |                        |
|-----------------------------------------------------------------------|-----------------------|-----------------------|------------------------|
| <b>29. Volunteering has reduced my confidence</b> (Select one option) |                       |                       |                        |
| strongly agree<br>0                                                   | agree<br>1            | disagree<br>2         | strongly disagree<br>3 |
| <input type="radio"/>                                                 | <input type="radio"/> | <input type="radio"/> | <input type="radio"/>  |

  

|                                                                                                        |                       |                       |                        |
|--------------------------------------------------------------------------------------------------------|-----------------------|-----------------------|------------------------|
| <b>30. Volunteering has given me new knowledge about supportive supervision</b><br>(Select one option) |                       |                       |                        |
| strongly agree<br>0                                                                                    | agree<br>1            | disagree<br>2         | strongly disagree<br>3 |
| <input type="radio"/>                                                                                  | <input type="radio"/> | <input type="radio"/> | <input type="radio"/>  |

  

|                                                                    |                       |                       |                        |
|--------------------------------------------------------------------|-----------------------|-----------------------|------------------------|
| <b>31. Volunteering has been of no benefit</b> (Select one option) |                       |                       |                        |
| strongly agree<br>0                                                | agree<br>1            | disagree<br>2         | strongly disagree<br>3 |
| <input type="radio"/>                                              | <input type="radio"/> | <input type="radio"/> | <input type="radio"/>  |

  

|                                                                                            |                       |                       |                        |
|--------------------------------------------------------------------------------------------|-----------------------|-----------------------|------------------------|
| <b>32. Volunteering has increased my general administrative skills</b> (Select one option) |                       |                       |                        |
| strongly agree<br>0                                                                        | agree<br>1            | disagree<br>2         | strongly disagree<br>3 |
| <input type="radio"/>                                                                      | <input type="radio"/> | <input type="radio"/> | <input type="radio"/>  |

  

|                                                                                                         |                       |                       |                        |
|---------------------------------------------------------------------------------------------------------|-----------------------|-----------------------|------------------------|
| <b>33. Volunteering has increased my understanding of good clinical practice</b><br>(Select one option) |                       |                       |                        |
| strongly agree<br>0                                                                                     | agree<br>1            | disagree<br>2         | strongly disagree<br>3 |
| <input type="radio"/>                                                                                   | <input type="radio"/> | <input type="radio"/> | <input type="radio"/>  |

  

|                                                                                                 |                       |                       |                        |
|-------------------------------------------------------------------------------------------------|-----------------------|-----------------------|------------------------|
| <b>34. Volunteering has made me better able to manage language barriers</b> (Select one option) |                       |                       |                        |
| strongly agree<br>0                                                                             | agree<br>1            | disagree<br>2         | strongly disagree<br>3 |
| <input type="radio"/>                                                                           | <input type="radio"/> | <input type="radio"/> | <input type="radio"/>  |

**35. Volunteering has increased my appreciation of respectful care** (Select one option)

| strongly agree<br>0   | agree<br>1            | disagree<br>2         | strongly disagree<br>3 |
|-----------------------|-----------------------|-----------------------|------------------------|
| <input type="radio"/> | <input type="radio"/> | <input type="radio"/> | <input type="radio"/>  |

**36. Has the experience of volunteering altered your previous perspectives?** (Select one option)

- ☐ Yes
- ☐ No
- ☐ Unsure

**37. How has the experience of volunteering changed your perspectives?**

- ☐ I have reconsidered my current career pathway
- ☐ I no longer want to be involved in volunteering
- ☐ I appreciate the impact that building capacity of local healthcare providers can have in a low resource setting
- ☐ I am disillusioned by the use of aid in international development work
- ☐ I have a greater awareness of the need for sustainable and collaborative partnerships attaining good quality maternal and newborn health outcomes
- ☐ I understand further the challenges and barriers facing healthcare providers in improving maternal and newborn health outcomes in low resource settings
- ☐ No change in perspective
- ☐ Other (Please specify) \_\_\_\_\_

**38. In your opinion, did the Making it Happen training course impacted on the country in which you volunteered?**

- ☐ Yes
- ☐ No
- ☐ Unsure

**39. The 'Making it Happen' programme has contributed more than individual volunteering at a particular clinic or hospital.** (Select one option)

| strongly agree<br>0   | agree<br>1            | disagree<br>2         | strongly disagree<br>3 |
|-----------------------|-----------------------|-----------------------|------------------------|
| <input type="radio"/> | <input type="radio"/> | <input type="radio"/> | <input type="radio"/>  |

**40. The 'Making it Happen' program has no impact** (Select one option)

| strongly agree<br>0   | agree<br>1            | disagree<br>2         | strongly disagree<br>3 |
|-----------------------|-----------------------|-----------------------|------------------------|
| <input type="radio"/> | <input type="radio"/> | <input type="radio"/> | <input type="radio"/>  |

**41. The Making it Happen project improved knowledge and skills of participants** (Select one option)

| strongly agree<br>0   | agree<br>1            | disagree<br>2         | strongly disagree<br>3 |
|-----------------------|-----------------------|-----------------------|------------------------|
| <input type="radio"/> | <input type="radio"/> | <input type="radio"/> | <input type="radio"/>  |

**42. The project builds teaching and leadership skills in the host country** (Select one option)

| strongly agree<br>0   | agree<br>1            | disagree<br>2         | strongly disagree<br>3 |
|-----------------------|-----------------------|-----------------------|------------------------|
| <input type="radio"/> | <input type="radio"/> | <input type="radio"/> | <input type="radio"/>  |

**43. The project is a waste of resources** (Select one option)

| strongly agree<br>0   | agree<br>1            | disagree<br>2         | strongly disagree<br>3 |
|-----------------------|-----------------------|-----------------------|------------------------|
| <input type="radio"/> | <input type="radio"/> | <input type="radio"/> | <input type="radio"/>  |

  

| <b>44. The project promotes and fosters support for multidisciplinary team working</b><br>(Select one option) |                       |                       |                        |
|---------------------------------------------------------------------------------------------------------------|-----------------------|-----------------------|------------------------|
| strongly agree<br>0                                                                                           | agree<br>1            | disagree<br>2         | strongly disagree<br>3 |
| <input type="radio"/>                                                                                         | <input type="radio"/> | <input type="radio"/> | <input type="radio"/>  |

  

| <b>45. The project demonstrates the importance of sustainable and collaborative partnerships</b> (Select one option) |                       |                       |                        |
|----------------------------------------------------------------------------------------------------------------------|-----------------------|-----------------------|------------------------|
| strongly agree<br>0                                                                                                  | agree<br>1            | disagree<br>2         | strongly disagree<br>3 |
| <input type="radio"/>                                                                                                | <input type="radio"/> | <input type="radio"/> | <input type="radio"/>  |

  

| <b>46. What in your opinion are features that promote a successful volunteering experience?</b> |  |  |  |
|-------------------------------------------------------------------------------------------------|--|--|--|
| <hr/> <hr/>                                                                                     |  |  |  |

  

| <b>47. What in your opinion are barriers to a successful volunteering experience?</b> |  |  |  |
|---------------------------------------------------------------------------------------|--|--|--|
| <hr/> <hr/>                                                                           |  |  |  |

  

| <b>48. Would you recommend volunteering to a colleague?</b> (Select one option) |  |  |  |
|---------------------------------------------------------------------------------|--|--|--|
| <input type="radio"/> Yes                                                       |  |  |  |
| <input type="radio"/> No                                                        |  |  |  |
| <input type="radio"/> Other (Please specify) _____                              |  |  |  |

  

| <b>49. Please add any other comments or suggestions regarding the 'Making it Happen' programme.</b> |  |  |  |
|-----------------------------------------------------------------------------------------------------|--|--|--|
| <hr/> <hr/>                                                                                         |  |  |  |

  

HEALTHCARE VOLUNTEERS WHO FACILITATE TRAINING IN MATERNAL AND NEWBORN HEALTH PROGRAMMES IN LOW AND MIDDLE INCOME COUNTRIES: AN ONLINE SURVEY REGARDING BENEFITS FOR THE VOLUNTEER, THE HOST COUNTRY AND THE HOME (UK) COUNTRY.

---
